# Supplementary material
Source: PubMed Central journal article supplement (PMC6486941)
Supplement: 13280_2018_1090_MOESM1_ESM.pdf [file 13280_2018_1090_MOESM1_ESM.pdf]

**Ambio**

<https://doi.org/10.1007/s13280-018-1090-3>

Electronic Supplementary Material

**A Review of Quality of Life (QOL) Assessments and Indicators: Towards a  
“QOL-Climate” Assessment Framework**

Ronald C. Estoque, Takuya Togawa, Makoto Ooba, Kei Gomi, Shogo Nakamura,  
Yasuaki Hijioka, Yasuko Kameyama

**Table S1.** Research areas based on the 3251 research articles as per the WoS classification. Research areas in blue texts were the ones considered in the second stage of the bibliometric analysis, which resulted in 178 research articles.

| Research Area                              | No. of Articles | Research Area                          | No. of Articles | Research Area                           | No. of Articles |
|--------------------------------------------|-----------------|----------------------------------------|-----------------|-----------------------------------------|-----------------|
| HEALTH CARE SCIENCES SERVICES              | 510             | ALLERGY                                | 32              | MICROBIOLOGY                            | 4               |
| PUBLIC ENVIRONMENTAL OCCUPATIONAL HEALTH   | 379             | SPORT SCIENCES                         | 31              | PHYSIOLOGY                              | 4               |
| ONCOLOGY                                   | 368             | EDUCATION EDUCATIONAL RESEARCH         | 29              | PUBLIC ADMINISTRATION                   | 4               |
| SURGERY                                    | 346             | SCIENCE TECHNOLOGY OTHER TOPICS        | 28              | ZOOLOGY                                 | 4               |
| NEUROSCIENCES NEUROLOGY                    | 269             | ENVIRONMENTAL SCIENCES ECOLOGY         | 24              | BIOCHEMISTRY MOLECULAR BIOLOGY          | 3               |
| GENERAL INTERNAL MEDICINE                  | 201             | VETERINARY SCIENCES                    | 23              | CONSTRUCTION BUILDING TECHNOLOGY        | 3               |
| UROLOGY NEPHROLOGY                         | 151             | INFECTIOUS DISEASES                    | 21              | FOOD SCIENCE TECHNOLOGY                 | 3               |
| REHABILITATION                             | 150             | ANESTHESIOLOGY                         | 20              | GEOGRAPHY                               | 3               |
| PSYCHIATRY                                 | 138             | NUTRITION DIETETICS                    | 19              | OPERATIONS RESEARCH MANAGEMENT SCIENCE  | 3               |
| PSYCHOLOGY                                 | 135             | ENGINEERING                            | 18              | PARASITOLOGY                            | 3               |
| DENTISTRY ORAL SURGERY MEDICINE            | 124             | GENETICS HEREDITY                      | 17              | URBAN STUDIES                           | 3               |
| OTORHINOLARYNGOLOGY                        | 124             | BEHAVIORAL SCIENCES                    | 16              | WOMEN S STUDIES                         | 3               |
| GASTROENTEROLOGY HEPATOLOGY                | 123             | MEDICAL INFORMATICS                    | 16              | ACOUSTICS                               | 2               |
| PEDIATRICS                                 | 117             | INTEGRATIVE COMPLEMENTARY MEDICINE     | 15              | CHEMISTRY                               | 2               |
| CARDIOVASCULAR SYSTEM CARDIOLOGY           | 115             | SUBSTANCE ABUSE                        | 13              | DEVELOPMENTAL BIOLOGY                   | 2               |
| DERMATOLOGY                                | 96              | BIOTECHNOLOGY APPLIED MICROBIOLOGY     | 10              | GOVERNMENT LAW                          | 2               |
| NURSING                                    | 94              | CELL BIOLOGY                           | 10              | IMAGING SCIENCE PHOTOGRAPHIC TECHNOLOGY | 2               |
| RESPIRATORY SYSTEM                         | 84              | MATHEMATICS                            | 10              | INSTRUMENTS INSTRUMENTATION             | 2               |
| OBSTETRICS GYNECOLOGY                      | 83              | AUDIOLOGY SPEECH LANGUAGE PATHOLOGY    | 8               | LINGUISTICS                             | 2               |
| GERIATRICS GERONTOLOGY                     | 76              | ANTHROPOLOGY                           | 7               | MATHEMATICAL METHODS IN SOCIAL SCIENCES | 2               |
| RHEUMATOLOGY                               | 75              | COMPUTER SCIENCE                       | 7               | PHYSICAL GEOGRAPHY                      | 2               |
| SOCIAL SCIENCES OTHER TOPICS               | 72              | REPRODUCTIVE BIOLOGY                   | 7               | REMOTE SENSING                          | 2               |
| ORTHOPEDICS                                | 69              | SOCIAL WORK                            | 7               | TOXICOLOGY                              | 2               |
| IMMUNOLOGY                                 | 66              | TROPICAL MEDICINE                      | 7               | TRANSPORTATION                          | 2               |
| OPHTHALMOLOGY                              | 66              | BIOPHYSICS                             | 6               | AUTOMATION CONTROL SYSTEMS              | 1               |
| ENDOCRINOLOGY METABOLISM                   | 62              | PATHOLOGY                              | 6               | COMMUNICATION                           | 1               |
| PHARMACOLOGY PHARMACY                      | 58              | EMERGENCY MEDICINE                     | 5               | CRIMINOLOGY PENOLOGY                    | 1               |
| RESEARCH EXPERIMENTAL MEDICINE             | 57              | FAMILY STUDIES                         | 5               | GEOLOGY                                 | 1               |
| BUSINESS ECONOMICS                         | 56              | LIFE SCIENCES BIOMEDICINE OTHER TOPICS | 5               | MECHANICS                               | 1               |
| HEMATOLOGY                                 | 54              | SOCIAL ISSUES                          | 5               | MEDICAL ETHICS                          | 1               |
| RADIOLOGY NUCLEAR MEDICINE MEDICAL IMAGING | 53              | AGRICULTURE                            | 4               | MEDICAL LABORATORY TECHNOLOGY           | 1               |
| SOCIOLOGY                                  | 52              | INFORMATION SCIENCE LIBRARY SCIENCE    | 4               | RELIGION                                | 1               |
| TRANSPLANTATION                            | 50              | MATHEMATICAL COMPUTATIONAL BIOLOGY     | 4               | TELECOMMUNICATIONS                      | 1               |
| BIOMEDICAL SOCIAL SCIENCES                 | 37              |                                        |                 |                                         |                 |

Note: The total number of articles is not equal to 3251 because some articles fall in more than one research area.

**Table S2.** The references (articles [1-19] and indexes [20-28]) reviewed and their details. The column called “No.,” which stands for number, corresponds to the column called “No.” in Tables 3 and S3, and to the numbers in Figs. 4 and 5. Here, dimension also refers to domain, component or their equivalent in the context of Fig. 6.

| No. | Purpose and Scope                                                                                                                                                                                                                   | Theoretical or Conceptual Basis                                                                                                         | Dimension (number of indicators)                                                                                                                                                                         | Weighting (level: dimension) – Aggregation Method (for the overall composite index) | Value Range and Unit (for the overall composite index)                                 | Reference <sup>a</sup> |
|-----|-------------------------------------------------------------------------------------------------------------------------------------------------------------------------------------------------------------------------------------|-----------------------------------------------------------------------------------------------------------------------------------------|----------------------------------------------------------------------------------------------------------------------------------------------------------------------------------------------------------|-------------------------------------------------------------------------------------|----------------------------------------------------------------------------------------|------------------------|
| 1   | This study describes an index methodology for measuring quality of life in different periods of time. The methodology has been applied in 314 municipalities of the province of Barcelona, Spain.<br><br>Context or Sector: General | Based on the concept of multidimensionality, which is the basis for the general concept of well-being                                   | Individual opportunities for progress (5); Index of social equilibrium (6); Community conditions of life (7)                                                                                             | Using equal weights - Weighted additive aggregation                                 | From less than 100 (low) to greater than 100 (high) (see reference for range)          | Royuela et al. (2003)  |
| 2   | This study demonstrates how a specific problem in urban quality of life evaluation can be addressed by a geo-visual multi-criteria evaluation, using Toronto, Canada as a case study.<br><br>Context or Sector: Urban/City          | Based on the concept of “urban quality of life” as either referring to personal health and well-being or to the residential environment | <i>Classical quality of life:</i> Benefits criteria (5); Cost criteria (5). <i>Contemporary quality of life:</i> Benefits criteria (7); Cost criteria (1)                                                | Analytic Hierarchy Process - Weighted additive aggregation                          | Census tracts are ranked                                                               | Rinner (2007)          |
| 3   | This study integrates remote sensing and census data to measure quality of life in the city of Indianapolis.<br><br>Context or Sector: Urban/City                                                                                   | Based on the concept of “urban quality of life” as a function of environmental and socioeconomic variables                              | <i>Environmental variables:</i> Greenness; Impervious surface; Temperature. <i>Socioeconomic variables:</i> Population density; Income; Poverty; Employment rate; Education level; House characteristics | Factor analysis - Weighted additive aggregation                                     | From less than negative one (low) to greater than two (high) (see reference for range) | Li and Weng (2007)     |
| 4   | This study develops an integrated method to evaluate accessibility, quality of life, and social interaction, using Takamatsu, Japan as a case study.<br><br>Context or Sector: Urban/City (Transportation-related)                  | Based on the concept of “quality of life” focusing on the livability of the environment (physical and social)                           | Safety and security (4); Economic opportunity (3); Service and cultural opportunity (3); Spatial amenity (3); Environmental benignity (3)                                                                | Survey questionnaire - Weighted additive aggregation                                | 0-100 (low-high)                                                                       | Doi et al. (2008)      |

|   |                                                                                                                                                                                                                                                                                                                                                                     |                                                                                                                                                 |                                                                                                                                                                                                                          |                                                                       |                              |                           |
|---|---------------------------------------------------------------------------------------------------------------------------------------------------------------------------------------------------------------------------------------------------------------------------------------------------------------------------------------------------------------------|-------------------------------------------------------------------------------------------------------------------------------------------------|--------------------------------------------------------------------------------------------------------------------------------------------------------------------------------------------------------------------------|-----------------------------------------------------------------------|------------------------------|---------------------------|
| 5 | <p>This study presents a multidimensional analysis of welfare based on the social indicators approach aimed at assessing the quality of life in the 25 member countries of the European Union.</p> <p>Context or Sector: General</p>                                                                                                                                | Based on the concept of quality of life as a function of social indicators                                                                      | <p>A total of 27 indicators in various contexts (dimensions) were used to derive a single quality of life index. The World Database of Happiness was used to assess subjective well-being.</p>                           | Factor analysis - Factor analysis                                     | -2.5 to + 2.5 (low-high)     | Grasso and Canova (2008)  |
| 6 | <p>This study focuses on the construction of an education index in Human Development Index (HDI) from global, national, and 18 sub-national human development reports in India since 1990. Implications were highlighted for measurement of quality of life indices with special reference to physical quality of life index.</p> <p>Context or Sector: General</p> | The assessment of quality of life was based on the concept of physical quality of life as a function of three indicators                        | It cited a previous study that used three indicators to derive the physical quality of life index: infant mortality; life expectancy at age one; education (measured by basic or adult literacy rate).                   | Using equal weights - Weighted additive aggregation                   | 0-100 (low-high)             | Narayana (2009)           |
| 7 | <p>This study assesses quality of life in Uttarakhand, India using geospatial techniques. It attempted to estimate environmental variables from remote sensing imagery, and to design and develop a census database to extract socio-economic variables.</p> <p>Context or Sector: General</p>                                                                      | Based on the concept of "quality of life" as a function of objective socioeconomic and environmental variables                                  | <p><i>Environmental variables:</i><br/>Green vegetation; Impervious surface; Temperature.</p> <p><i>Socioeconomic variables:</i><br/>Population density; Housing density; Median household income; Per capita income</p> | Factor analysis - Weighted additive aggregation                       | Qualitative scale (low-high) | Rao et al. (2012)         |
| 8 | <p>This study presents the application of quality of life techniques to the transport networks of Glasgow and Manchester to determine if this is a valuable alternative in transport appraisal.</p> <p>Context or Sector: Urban/City (Transportation-related)</p>                                                                                                   | Based on the concept of "transport quality of life" as a tool to appraise the economic, environmental, and social impacts of transport projects | Final: Access and availability (3); Environment (3); Sustainable transport (2); Personal safety (2); Travel costs (2)                                                                                                    | Dimensions were unaggregated                                          | Not applicable               | Carse (2011)              |
| 9 | <p>This study explores the possibilities presented by DEA to assess quality of life and evaluate the performance of city managers with regards to concerns in promoting urban quality of life in European cities.</p> <p>Context or Sector: Urban/City</p>                                                                                                          | Based on the concept of "urban quality of life"                                                                                                 | Demography (3); Social aspects (7); Economic aspects (5); Civic involvement (1); Training and education (3); Environment (4); Transport and travel (2); Information society (1); Culture and recreation (3)              | Data envelopment analysis (DEA) - DEA's weighted additive aggregation | 0-100% (low-high)            | Morais and Camanho (2011) |

|           |                                                                                                                                                                                                                                                                                                                                                                      |                                                                                                                                |                                                                                                                                                                                                                                                               |                                                                       |                                                              |                         |
|-----------|----------------------------------------------------------------------------------------------------------------------------------------------------------------------------------------------------------------------------------------------------------------------------------------------------------------------------------------------------------------------|--------------------------------------------------------------------------------------------------------------------------------|---------------------------------------------------------------------------------------------------------------------------------------------------------------------------------------------------------------------------------------------------------------|-----------------------------------------------------------------------|--------------------------------------------------------------|-------------------------|
| <b>10</b> | This study quantifies the relative importance of three different geographic levels of analysis in assessing the quality of life of the Spanish population.<br><br>Context or Sector: General                                                                                                                                                                         | Based on the concept of quality of life as social welfare                                                                      | The study used 19 variables, composed of 8 “drawbacks” (negative) and 11 “advantages” (positive)                                                                                                                                                              | Value efficiency analysis (VEA) - VEA's weighted additive aggregation | 0-100 (low-high)                                             | González et al. (2011a) |
| <b>11</b> | This study measures quality of life for the largest 237 Spanish municipalities using Value Efficiency Analysis (VEA) to derive comparative scores by combining the information contained in 19 partial indicators.<br><br>Context or Sector: General                                                                                                                 | Based on the concept of quality of life as social welfare                                                                      | The study used 19 variables, composed of 8 “drawbacks” (negative) and 11 “advantages” (positive)                                                                                                                                                              | Value efficiency analysis (VEA) - VEA's weighted additive aggregation | 0-1 (low-high)                                               | González (2011b)        |
| <b>12</b> | This study proposes an innovative methodology to measure urban quality of life when equity concerns arise. The method was applied to derive a quality of life index for the city of Milan.<br><br>Context or Sector: Urban/City                                                                                                                                      | Based on the concept of “urban quality of life” as the monetary value of urban amenities                                       | The study used six amenity variables to derive an overall quality of life index                                                                                                                                                                               | Using implicit prices - Weighted additive aggregation                 | Amount of money per neighborhood                             | Brambilla et al. (2013) |
| <b>13</b> | This study presents a comprehensive evaluation of the objective quality of life in the 31 provincial administrative divisions in Mainland China from 2006 to 2009 using principal component analysis (PCA).<br><br>Context or Sector: General                                                                                                                        | Based on the concept of objective quality of life as measured from seven aspects                                               | Economy (4); Consumption (3); Health (6); Science and education (4); Social security (5); Environment (5); Cultural and leisure activities (2)                                                                                                                | Weights based on variance - Principal component analysis              | From 0.0733 (low) to 2.3659 (high) (see reference for range) | Li and Wang (2013)      |
| <b>14</b> | This study discusses two basic theories of social measurement in development studies: The quality of life (QOL) and social quality (SQ) theories. Based on survey data collected from six Asian societies, several QOL and SQ factors were examined to illustrate how these two approaches are both distinctive and complementary.<br><br>Context or Sector: General | Based on the concepts of quality of life and social quality as two basic theories of social measurement in development studies | Income situation and satisfaction (4); Work situation and satisfaction (4); Health care situation and satisfaction (3); Education situation and satisfaction (3); Environment situation and satisfaction (2); Social relations situation and satisfaction (3) | Unweighted – Averaging                                                | Not applicable                                               | Lin (2013)              |
| <b>15</b> | This study assesses the urban quality of life in European cities from the perspective of qualified human resources. Urban quality of life was measured through a composite indicator constructed using data envelopment analysis.                                                                                                                                    | Based on the concepts of human capital and quality of life as an overall level of well-being and fulfillment                   | Political and social environment (7); Economic environment (1); Medical and health issues (14); Schools and education (6); Public services                                                                                                                    | Survey results by Mercer - DEA's weighted additive aggregation        | 0-100% (low-high)                                            | Morais et al. (2013)    |

|    |                                                                                                                                                                                                                                                                                                        |                                                                                                                                     |                                                                                                                                                                                                                                                                                                                                                            |                                                                                                                                                              |                                                                  |                                    |
|----|--------------------------------------------------------------------------------------------------------------------------------------------------------------------------------------------------------------------------------------------------------------------------------------------------------|-------------------------------------------------------------------------------------------------------------------------------------|------------------------------------------------------------------------------------------------------------------------------------------------------------------------------------------------------------------------------------------------------------------------------------------------------------------------------------------------------------|--------------------------------------------------------------------------------------------------------------------------------------------------------------|------------------------------------------------------------------|------------------------------------|
|    | Context or Sector: Urban/City                                                                                                                                                                                                                                                                          |                                                                                                                                     | and transport (5); Recreation (5); Housing (7); Natural environment (5)                                                                                                                                                                                                                                                                                    |                                                                                                                                                              |                                                                  |                                    |
| 16 | This study measures the quality of life of people living in the Indian city of Delhi using the fuzzy sets theory, an approach that is designed to handle inexact or “fuzzy” outcomes.<br><br>Context or Sector: Urban/City                                                                             | Based on quality of life viewed as a fundamental aspect of development and advancement of human societies and the fuzzy sets theory | Overall maintenance services (2); Green spaces in the neighborhood (4); Safety (3); Market facilities (3); Shelter (5); Transport services (5); Essential services (2)                                                                                                                                                                                     | Frequency-based weighting structure - Borda Rule (ordinal aggregator)                                                                                        | Qualitative scale (worst-best)                                   | Kapuria (2014)                     |
| 17 | This study identifies and measures the quality of life dimensions in urban transitional neighborhoods using both objective and subjective indices pertaining to Tehran’s Darvazeshemiran neighborhood.<br><br>Context or Sector: Urban/City                                                            | Based on the concept of quality of life considered as an approach to assess the levels of general welfare of the communities        | For Objective QOL: Availability of basic facilities (4); Socio-economic properties (5); Availability of recreational and sport facilities (5); Housing status (4); Housing congestion (2)<br><br>For Subjective QOL, refer to the article.                                                                                                                 | For Objective QOL: Weights based on variance - Principal component analysis (Weighted additive aggregation)<br><br>For Subjective QOL, refer to the article. | 1-6 (low-high)                                                   | Soleimani et al. (2014)            |
| 18 | An expert system for quality of life evaluation is developed as a new information technology derived from artificial intelligent research. This study presents a completely novel and innovative approach to quality of life evaluation—the usage of expert systems.<br><br>Context or Sector: General | Based on the concepts of expert system, sustainability, and quality of life as a shared and balanced process                        | The expert system includes eight domains to determine the degree of quality of life: (1) Economic situation; (2) Housing and environment; (3) Employment, education and skills; (4) Household and family relationships; (5) Balance between work and life; (6) Health and healthcare; (7) Urban subjective; and (8) Concepts of the quality of the society | Uncertainty factor - Expert system                                                                                                                           | Qualitative scale (No quality of life – Perfect quality of life) | Atanasova and Karashtranova (2016) |
| 19 | This study assesses tourism-related community quality of life, incorporating resident perceptions of satisfaction, importance, and tourism effects in Orange County, located in South Central Indiana.<br><br>Context or Sector: Tourism                                                               | Based on the concepts of tourism-related community quality of life and sustainable tourism development                              | Community conditions (17); Community services (12)                                                                                                                                                                                                                                                                                                         | Dimensions were unaggregated                                                                                                                                 | Not applicable                                                   | Yu et al. (2016)                   |

|    |                                                                                                                                                                                                                                                                                                                                                                                                         |                                                                                             |                                                                                                                                                                                                                 |                              |                            |                                                  |
|----|---------------------------------------------------------------------------------------------------------------------------------------------------------------------------------------------------------------------------------------------------------------------------------------------------------------------------------------------------------------------------------------------------------|---------------------------------------------------------------------------------------------|-----------------------------------------------------------------------------------------------------------------------------------------------------------------------------------------------------------------|------------------------------|----------------------------|--------------------------------------------------|
| 20 | <p><i>Human Development Index (HDI)</i>. HDI is a composite index of life expectancy, education, and per capita income indicators. It can be viewed as an index of “potential” human development or the maximum IHDI (see below) that could be achieved if there were no inequalities.</p> <p>Context or Sector: General</p>                                                                            | Based on the concept of “human development” – the progress towards greater human well-being | Long and healthy life (1); Knowledge (2); A decent standard of living (1)                                                                                                                                       | Unweighted – Geometric mean  | 0-1 (low-high)             | UNDP (1990, 2010, 2013)                          |
| 21 | <p><i>Genuine Progress Indicator (GPI)</i>. GPI is a metric developed to supplement the gross domestic product (GDP) indicator. It takes a fuller account of well-being by incorporating other variables not considered in the GDP such as environmental and social factors.</p> <p>Context or Sector: General</p>                                                                                      | Based on the concept of “sustainability,” including the concepts of “costs” and “benefits”  | Utility from consumption of market-based goods and services (5); Utility derived from the services of essential capital (4); Disutility associated with undesirable conditions and trends and externalities (4) | Unweighted – GPI equation    | Amount of money per capita | Cobb et al. (1995); Talberth and Weisdorf (2017) |
| 22 | <p><i>Happy Planet Index (HPI)</i>. HPI is designed to challenge well-established indices of countries’ development regarded as not taking sustainability into account, such as the GDP and HDI. It does not measure which are the happiest countries in the world, but rather measures the environmental efficiency in supporting well-being in a given country.</p> <p>Context or Sector: General</p> | Based on the concept of “sustainability,” including the concept of “ecological footprint”   | Life expectancy (1); Experienced well-being (1); Inequality outcomes (4); Ecological footprint (1)                                                                                                              | Unweighted – HPI equation    | 0-100 (unitless)           | Marks (2006); NEF (2016)                         |
| 23 | <p><i>Cities of Opportunity (Quality of Life) (COQOL)</i>. COQOL assesses the urbanites’ quality of life through four indicators: transportation and infrastructure; health, safety, and security; sustainability and the natural environment; and demographics and livability. It focuses on the infrastructure that serves the public good.</p> <p>Context or Sector: Urban/City</p>                  | Based on the concept of “sustainability,” including the concept of “global cities”          | Transportation and Infrastructure (7); Health, safety and security (6); Sustainability and the natural environment (7) Demographics and livability (7)                                                          | Dimensions were unaggregated | Not applicable             | PwC (2016) <sup>b</sup>                          |

|    |                                                                                                                                                                                                                                                                                                                                                                                                                                                                              |                                                                                                               |                                                                                                                                                                                                                                                                                          |                                                                   |                                                                                          |                                                         |
|----|------------------------------------------------------------------------------------------------------------------------------------------------------------------------------------------------------------------------------------------------------------------------------------------------------------------------------------------------------------------------------------------------------------------------------------------------------------------------------|---------------------------------------------------------------------------------------------------------------|------------------------------------------------------------------------------------------------------------------------------------------------------------------------------------------------------------------------------------------------------------------------------------------|-------------------------------------------------------------------|------------------------------------------------------------------------------------------|---------------------------------------------------------|
| 24 | <p><i>Inequality-adjusted HDI (IHDI)</i>. IHDI is a measure of the level of human development of people in a society that accounts for inequality. When there is inequality in the distribution of health, education, and income, the HDI of an average person in a society is less than the aggregate HDI. The lower the IHDI (and the greater the difference between it and the HDI), the greater the inequality.</p> <p>Context or Sector: General</p>                    | Based on the concepts of “inequality” and “human development” – the progress towards greater human well-being | Long and healthy life (1); Knowledge (2); A decent standard of living (1). These dimensions are all inequality-adjusted                                                                                                                                                                  | Unweighted – Geometric mean                                       | 0-1 (unitless)                                                                           | UNDP (2010, 2013)                                       |
| 25 | <p><i>Better Life Index (BLI)</i>. BLI sought to address concerns that standard macroeconomic statistics like GDP failed to give a true account of people’s current and future well-being. Its online interactive tool allows users to compare well-being across countries in the areas of material living conditions and quality of life based on 11 topics the OECD has identified as essential.</p> <p>Context or Sector: General</p>                                     | Based on the concept of “a good or a better life” and “inequality”                                            | Housing (3); Income (2); Jobs (4); Community (1); Education (3); Environment (2); Civic engagement (2); Health (2); Life satisfaction (1); Safety (2); Work-life balance (2)                                                                                                             | User-defined weights (web version) – Dimensions were unaggregated | No final index, but its web application allows users to assign weights to the dimensions | OECD (2011, 2017)                                       |
| 26 | <p><i>Human Sustainable Development Index (HSDI)</i>. The HSDI is a proposed index of sustainable development in which an environmental component is added to the existing three socioeconomic indicators of the HDI. It proposes to include each nation’s per capita carbon emissions as a proxy indicator of the environmental component of the triple bottom line of sustainability.</p> <p>Context or Sector: General</p>                                                | Based on the concept of “sustainable development”                                                             | Long and healthy life (1); Knowledge (2); A decent standard of living (1); Per capita carbon emissions (1)                                                                                                                                                                               | Unweighted – Geometric mean                                       | 0-1 (unitless)                                                                           | Togtokh (2011)                                          |
| 27 | <p><i>Social Progress Index (SPI)</i>. SPI is an aggregate index of social and environmental indicators that capture three dimensions of social progress: basic human needs, foundations of well-being, and opportunity. It defines social progress as the capacity of a society to meet the basic needs of its citizens, establish the building blocks that allow citizens and communities to enhance and sustain the quality of their lives, and create the conditions</p> | Based on the concepts of “social progress,” “well-being,” and “sustainability”                                | <p><i>Basic Human Needs</i>: Nutrition and basic medical care (5); Water and sanitation (3); Shelter (4); Personal safety (5).<br/> <i>Foundations of Living</i>: Access to basic knowledge (4); Access to information and communication (3); Health and wellness (3); Environmental</p> | Using equal weights – Averaging                                   | 0-100 (unitless)                                                                         | Porter et al. (2014) <sup>c</sup> ; Stern et al. (2017) |



|    |                                                                                                                                                                                                                                                                                                                                                                       |                                                                                                                 |                                                                                                                                                                                                                                                                       |                                        |                        |                                   |
|----|-----------------------------------------------------------------------------------------------------------------------------------------------------------------------------------------------------------------------------------------------------------------------------------------------------------------------------------------------------------------------|-----------------------------------------------------------------------------------------------------------------|-----------------------------------------------------------------------------------------------------------------------------------------------------------------------------------------------------------------------------------------------------------------------|----------------------------------------|------------------------|-----------------------------------|
|    | for all individuals to reach their full potential.<br><br>Context or Sector: General                                                                                                                                                                                                                                                                                  |                                                                                                                 | quality (4). <i>Opportunity</i> :<br>Personal rights (4); Personal freedom and choice (5);<br>Tolerance and inclusion (5);<br>Access to advanced education (5)                                                                                                        |                                        |                        |                                   |
| 28 | <i>Social-Ecological Status Index (SESI)</i> . SESI is designed to measure social-ecological status based on social-ecological resilience and pressure. It is derived by using a framework that integrates various environmental and socioeconomic indicators, including indicators under the triple bottom line of sustainability.<br><br>Context or Sector: General | Based on the concepts of “sustainability,” “resilience,” “pressure,” and the social-ecological system paradigm. | <i>Source of social-ecological resilience</i> : Social integrity (1);<br>Governance integrity (1);<br>Ecological integrity (2).<br><i>Sources of social-ecological pressure</i> : Exposure to hazard (1);<br>Sensitivity to hazard (2);<br>Environmental pressure (2) | Using equal weights –<br>SESI equation | -1 to +1<br>(unitless) | Estoque and Murayama (2014, 2017) |

<sup>a</sup> The year reflects the date of first release or publication. <sup>b</sup> The first study was in 2007. <sup>c</sup> 2013 Beta version is available.

**Table S3.** Details on how subjective well-being (satisfaction, happiness, fulfillment, welfare, etc.) was explicitly considered in the respective assessments of some of the references. The column called “No.,” which stands for number, corresponds to the column called “No.” in Tables 3 and S2, and to the numbers in Figs. 4 and 5.

| No. | Detail                                                                                                                                       | Reference                             |
|-----|----------------------------------------------------------------------------------------------------------------------------------------------|---------------------------------------|
| 4   | Indicators were rated by the respondents based on their perceptions and satisfactions.                                                       | Doi et al.<br>(2008)                  |
| 5   | Subjective well-being was based on the attitudes to life (life satisfaction) of respondents, taken from the World Database of Happiness.     | Grasso and Canova (2008)              |
| 8   | For each indicator, the respondents were asked to rate their quality of life with regards to transport.                                      | Carse (2011)                          |
| 14  | Indicators were rated by the respondents based on their perceptions and satisfactions.                                                       | Lin (2013)                            |
| 16  | Indicators were rated by the respondents based on their perceptions and satisfactions.                                                       | Kapuria (2014)                        |
| 17  | Domains and indicators were rated by the respondents based on their satisfactions.                                                           | Soleimani et al.<br>(2014)            |
| 18  | In the “expert system” approach, the dimensions of quality of life ‘are’ assessed by the users based on their perceptions and satisfactions. | Atanasova and Karashtranova<br>(2016) |
| 19  | Indicators were rated by the respondents based on their perceptions and satisfactions.                                                       | Yu et al. (2016)                      |
| 22  | This index used respondents' ratings of their own well-being.                                                                                | NEF (2016)                            |
| 23  | With the use indicators like “quality of living” and “senior wellbeing”. See reference.                                                      | PwC (2016)                            |
| 25  | This index used respondents' ratings of their own life satisfaction.                                                                         | OECD (2017)                           |

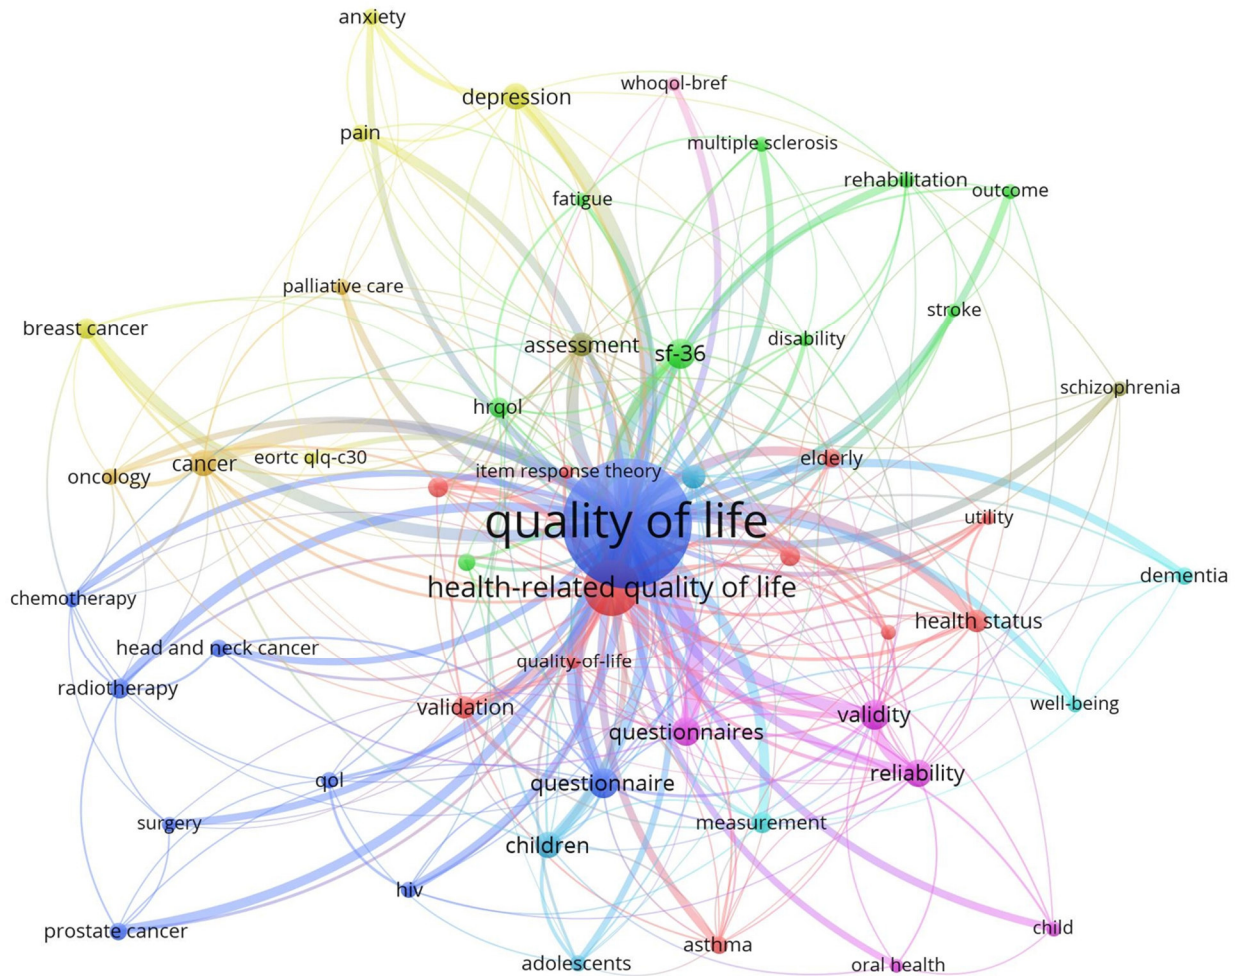

**Fig. S1.** Total occurrences and network of authors' keywords based on the 3251 articles. Note: Fractional counting was used, which means that the weight of a link was fractionalized. For example, if a keyword co-occurs with five other keywords, each of the five keywords has a weight of 0.2 (1/5). For these 3251 articles, a threshold of 20 was used (i.e. the minimum number of occurrences for each keyword), which resulted in a total of 51 keywords.

## References

- Atanasova, I., and E. Karashtranova. 2016. A novel approach for quality of life evaluation: Rule-based expert system. *Social Indicators Research* 128: 709–722.
- Brambilla, M., A. Michelangeli, and E. Peluso. 2013. Equity in the city: On measuring urban (ine)quality of life. *Urban Studies* 50: 3205–3224.
- Carse, A. 2011. Assessment of transport quality of life as an alternative transport appraisal technique. *Journal of Transport Geography* 19: 1037–1045.
- Cobb, C., T. Halstead, and J. Rowe. 1995. If the GDP is up, why is America down? *Atlantic-Boston* 276: 59–79.
- Doi, K., M. Kii, and H. Nakanishi. 2008. An integrated evaluation method of accessibility, quality of life, and social interaction. *Environment and Planning B* 35: 1098–1116.
- Estoque, R.C., and Y. Murayama. 2014. Social-ecological status index: A preliminary study of its structural composition and application. *Ecological Indicators* 43: 183–194.
- Estoque, R.C., and Y. Murayama. 2017. A worldwide country-based assessment of social-ecological status (c. 2010) using the social-ecological status index. *Ecological Indicators* 72: 605–614.
- González, E., A. Cárcaba, and J. Ventura. 2011a. The importance of the geographic level of analysis in the assessment of the quality of life: The case of Spain. *Social Indicators Research* 102: 209–228.
- González, E., A. Cárcaba, J. Ventura, and J. Garcia. 2011b. Measuring quality of life in Spanish municipalities. *Local Government Studies* 37: 171–197.
- Grasso, M., and L. Canova. 2008. An assessment of the quality of life in the European union based on the social indicators approach. *Social Indicators Research* 87: 1–25.
- Kapuria, P. 2014. Quality of life in the city of Delhi: An assessment based on access to basic services. *Social Indicators Research* 117: 459–487.
- Li, G., and Q. Weng. 2007. Measuring the quality of life in city of Indianapolis by integration of remote sensing and census data. *International Journal of Remote Sensing* 28: 249–267.
- Li, Z., and P. Wang. 2013. Comprehensive evaluation of the objective quality of life of Chinese residents: 2006 to 2009. *Social Indicators Research* 113: 1075–1090.
- Lin, K. 2013. A methodological exploration of social quality research: A comparative evaluation of the quality of life and social quality approaches. *International Sociology* 28: 316–334.
- Marks, N. 2006. The (un)Happy Planet Index: An index of Human Well-Being and Environmental Impact. New Economics Foundation (NEF).
- Morais, P., and A.S. Camanho. 2011. Evaluation of performance of European cities with the aim to promote quality of life improvements. *Omega* 39: 398–409.
- Morais, P., V.L. Miguéis, and A.S. Camanho. 2013. Quality of life experienced by human capital: An assessment of European cities. *Social Indicators Research* 110: 187–206.
- Narayana, M.R. 2009. Education, human development and quality of life: Measurement issues and implications for India. *Social Indicators Research* 90: 279–293.
- NEF. 2016. Happy Planet Index 2016: Methods Paper. New Economic Foundation.
- OECD. 2011. *How's Life? Measuring Well-Being*. Paris: OECD Publishing.
- OECD. 2017. *Better Life Index - Edition 2017*. OECD. <https://stats.oecd.org/index.aspx?DataSetCode=BLI>.
- Porter, M.E., S. Stern, and M. Green. 2014. *Social Progress Index 2014*. USA: Social Progress Imperative.
- PwC. 2016. *Cities of Opportunity 7*. London, UK: PwC.
- Rao, K.R.M., Y. Kant, N. Gahlaut, and P.S. Roy. 2012. Assessment of quality of life in Uttarakhand, India using geospatial techniques. *Geocarto International* 27: 315–328.
- Rinner, C. 2007. A geographic visualization approach to multi-criteria evaluation of urban quality of life. *International Journal of Geographical Information Science* 21: 907–919.
- Royuela, V., J. Suriñach, M. Reyes. 2003. Measuring quality of life in small areas over different periods of time. *Social Indicators Research* 64: 51–74.
- Soleimani, M., S. Tavallaee, H. Mansourian, and Z. Barati. 2014. The assessment of quality of life in transitional neighborhoods. *Social Indicators Research* 119: 1589–1602.
- Stern, S., A. Wares, and T. Epner. 2017. *Social Progress Index 2017*. USA: Social Progress Imperative.
- Talberth, J., and M. Weisdorf. 2017. Genuine progress indicator 2.0: Pilot Accounts for the US, Maryland, and City of Baltimore 2012–2014. *Ecological Economics* 142: 1–11.
- Togtokh, C. 2011. Time to stop celebrating the polluters. *Nature* 479: 269.
- UNDP. 1990. *Human Development Report 1990*. Oxford: Oxford University Press.
- UNDP. 2010. *Human Development Report 2010: The Real Wealth of Nations: Pathways to Human Development*. New York, NY, USA: Palgrave Macmillan.
- UNDP. 2013. *Human Development Report 2013: The Rise of the South Human Progress in a Diverse World—Technical Notes*. United Nations Development Programme.
- Yu, C.P., S.T. Cole, and C. Chancellor. 2016. Assessing community quality of life in the context of tourism development. *Applied Research in Quality of Life* 11: 147–162.
